# Supplementary material for: Broadly Applicable Control Approaches Improve Accuracy of ChIP-Seq Data
Source: MDPI journal article supplement (doi:10.3390/ijms24119271), 2023-05-25
Supplement: s1 [file s1]

**Figure S1**

**A**

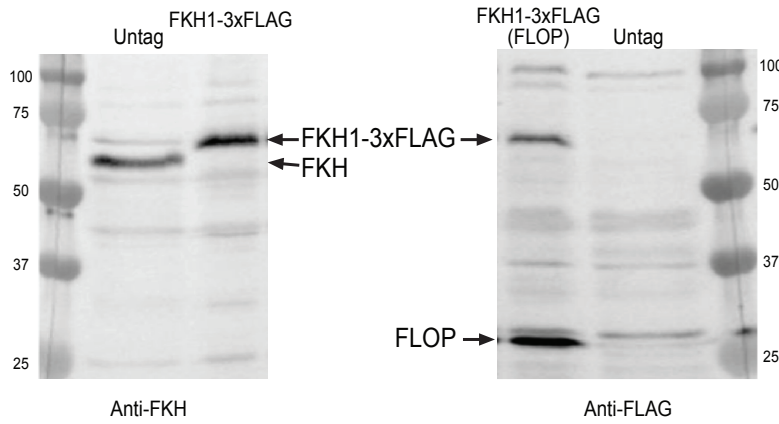

**B**

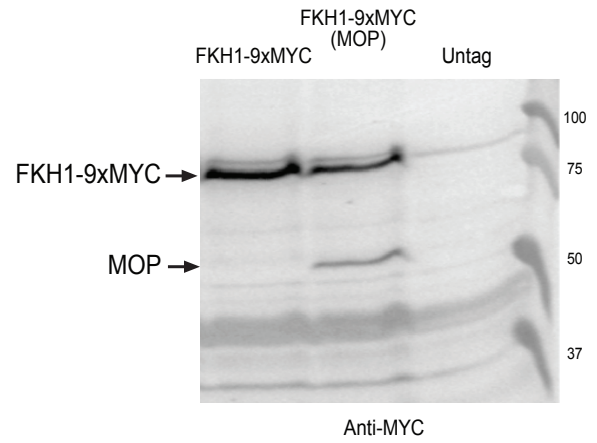

**C**

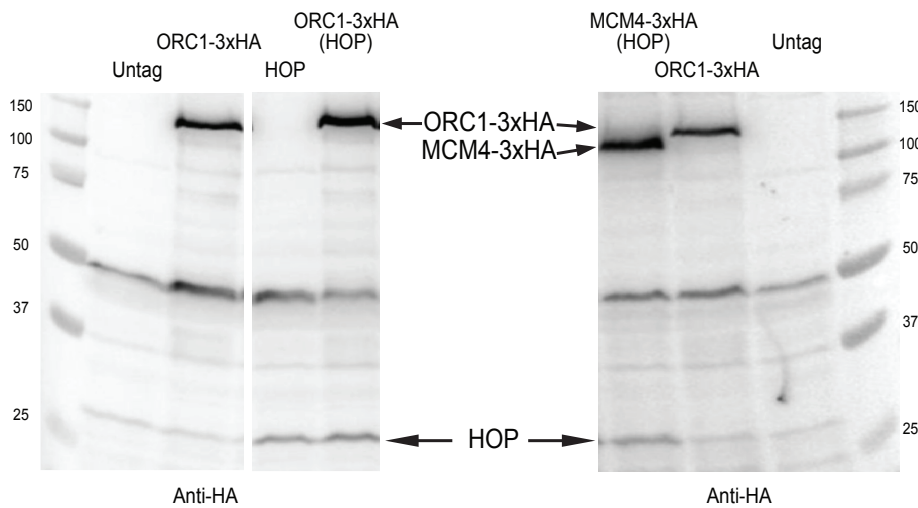

**D**

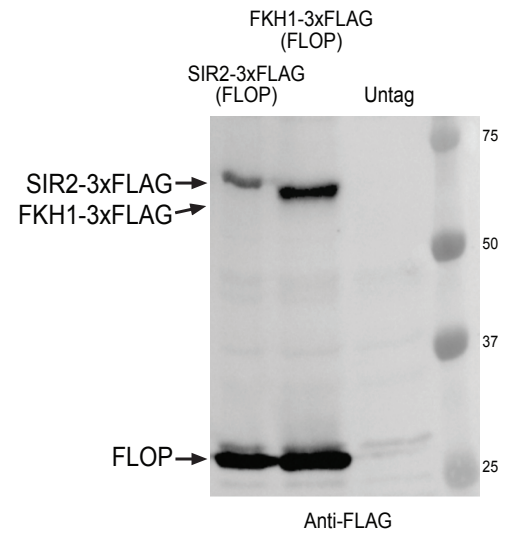

**Supplement to Figure S1.** Western blot analysis of epitope-tagged strains used throughout this study: “Untag” is SSy161 throughout,  
**(A)** OAy1146 (FKH1-3xFLAG) and MPy55 (FKH1-3xFLAG FLOP).  
**(B)** MPy166 (FKH1-9xMYC) and MPy108 (FKH1-9xMYC MOP).  
**(C)** OAy503 (ORC1-3x-HA), MPy39 (HOP), MPy199 (ORC1-3xHA HOP), MPy184 (MCM4-3xHA HOP).  
**(D)** YHy29 (SIR2-3xFLAG FLOP) MPy55 (FKH1-3xFLAG FLOP).

Figure S2

A

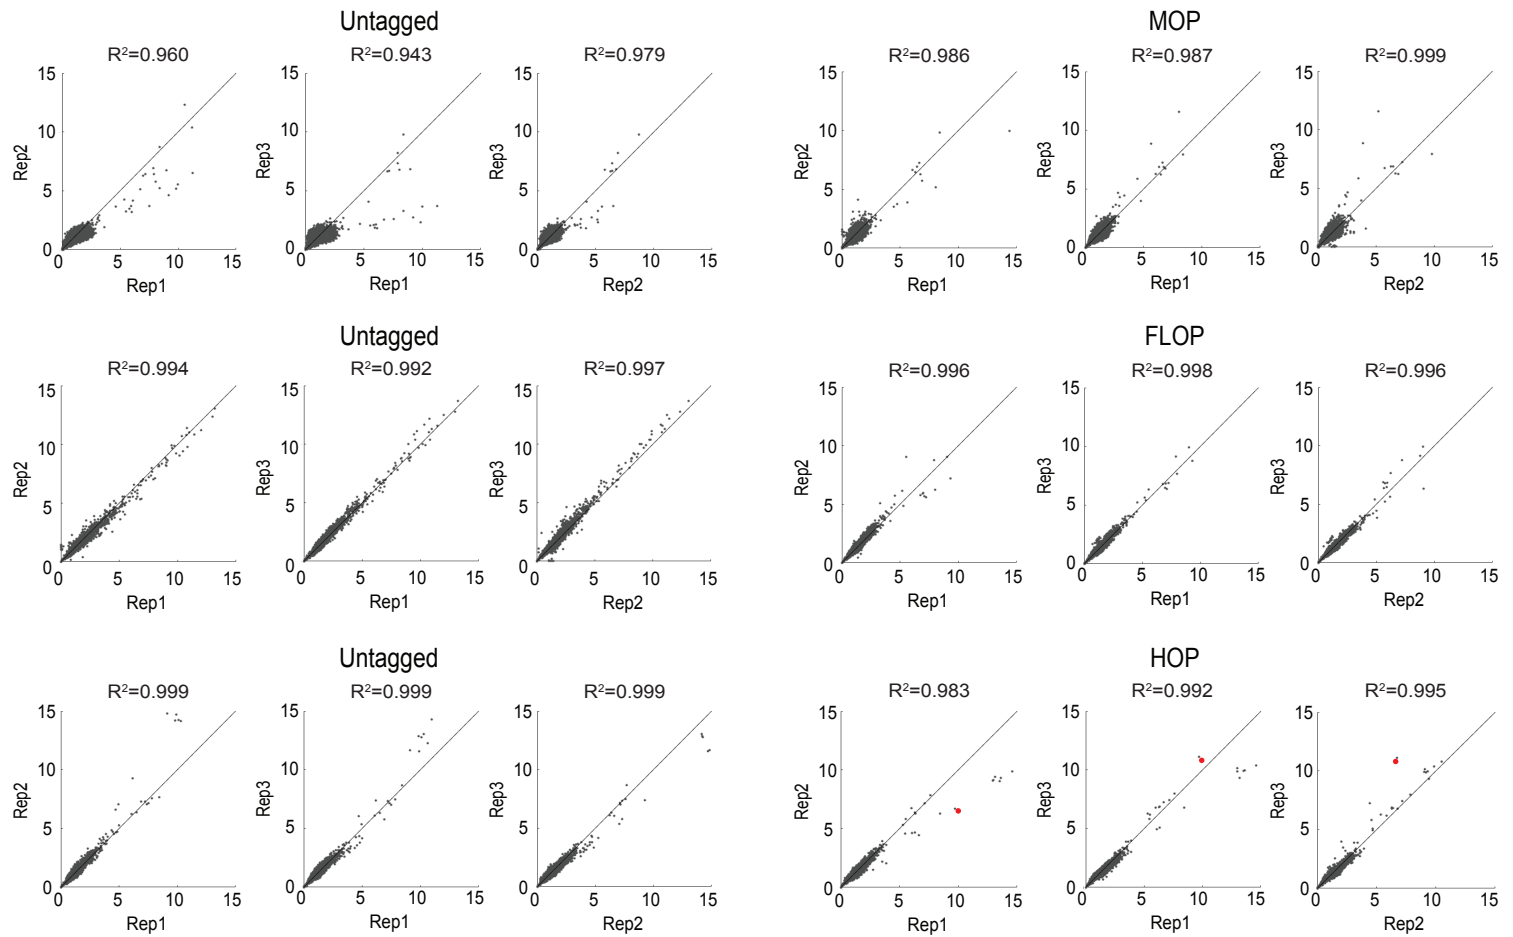

B

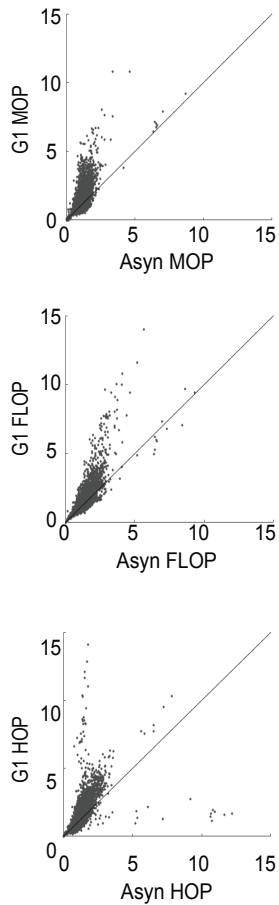

C

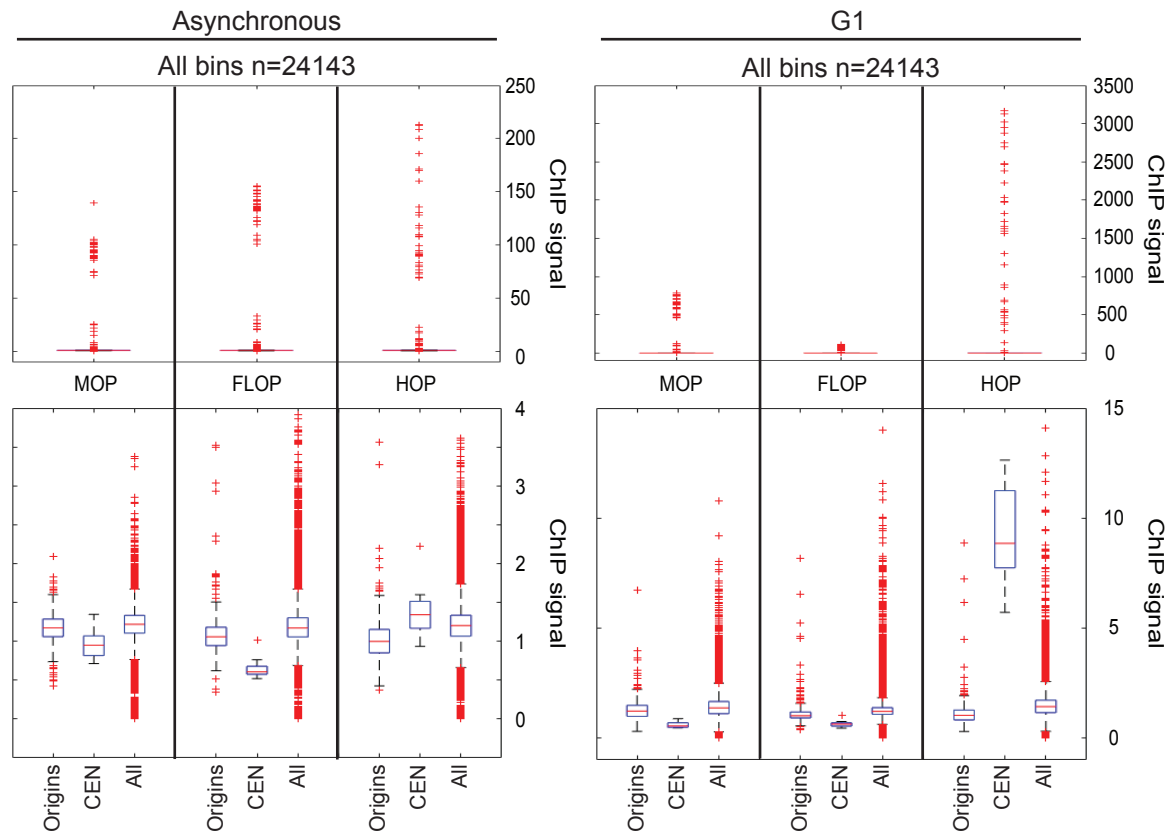

**Supplement to Figure S2. (A)** Two-dimensional scatter plots analyzing correlation of sample replicates. **(B)** Two-dimensional scatter plots of unsynchronized vs G1-synchronized MOP/FLOP/HOP data. **(C)** Boxplots of ChIP signals at replication origins and CENs.

**Figure S3. (A)** Two-dimensional scatter plots analyzing correlation of replicates. **(B)** Plots of ChIP signal across chromosomes III-L and IX with potential Fkh1 binding sites indicated as colored circles on one track and called peaks indicated on the lower track. **(C)** Heatmaps of averaged ChIP signal at snoRNAs.

**A**

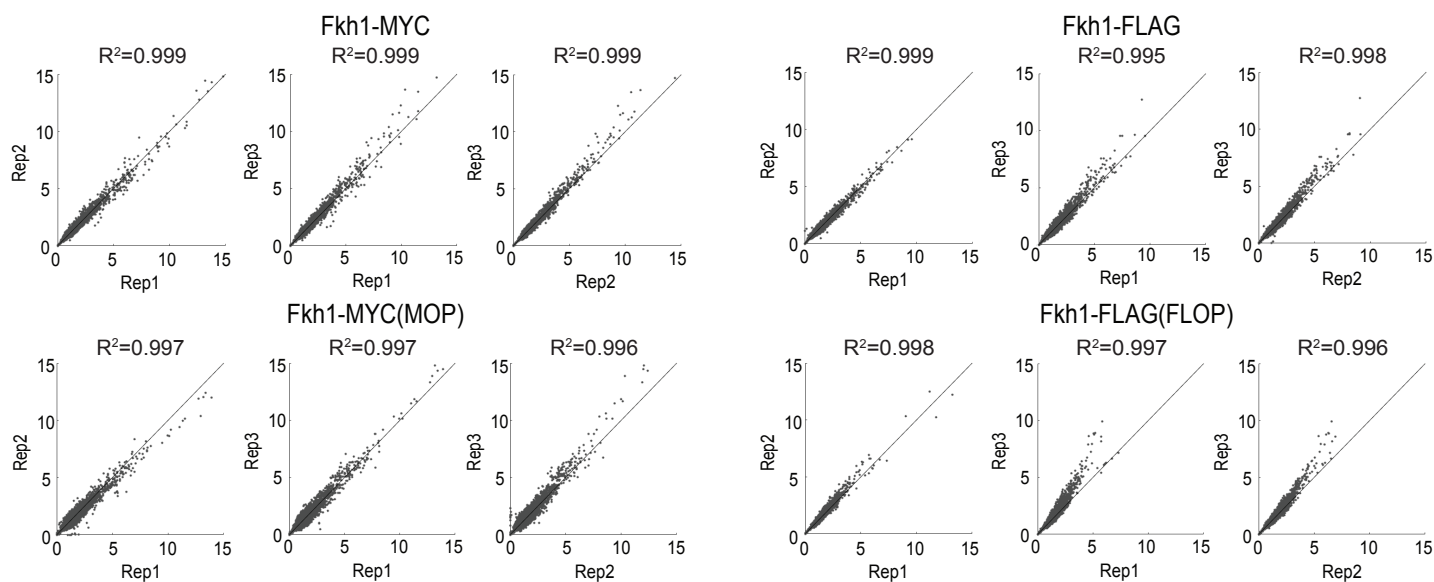

**B**

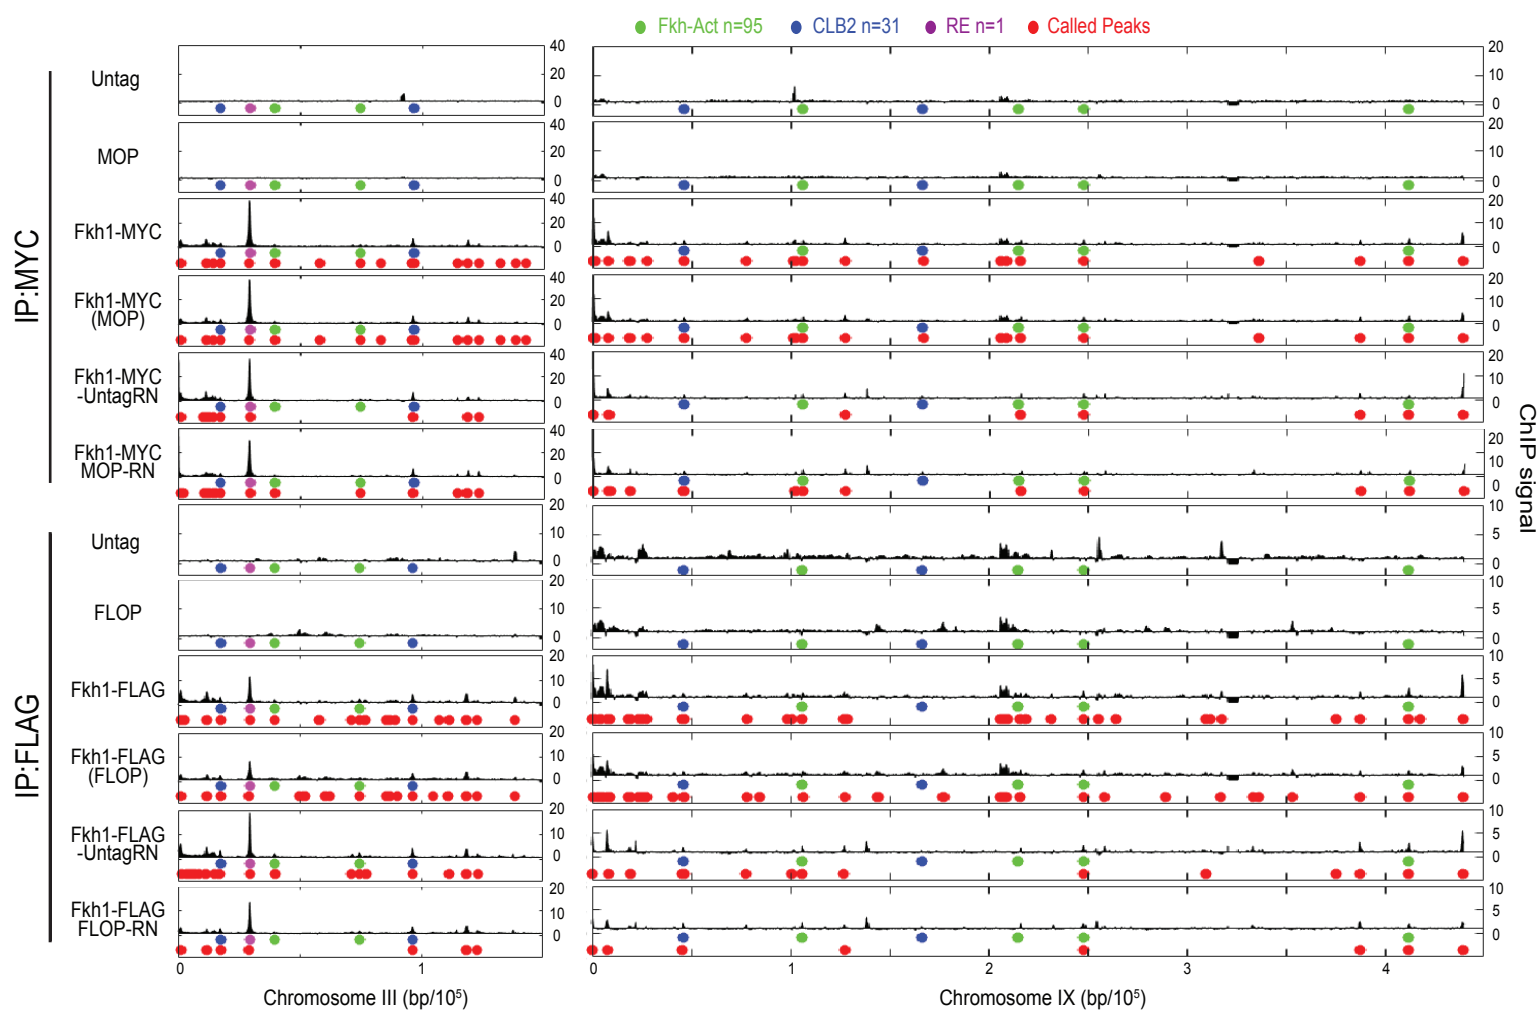

**C**

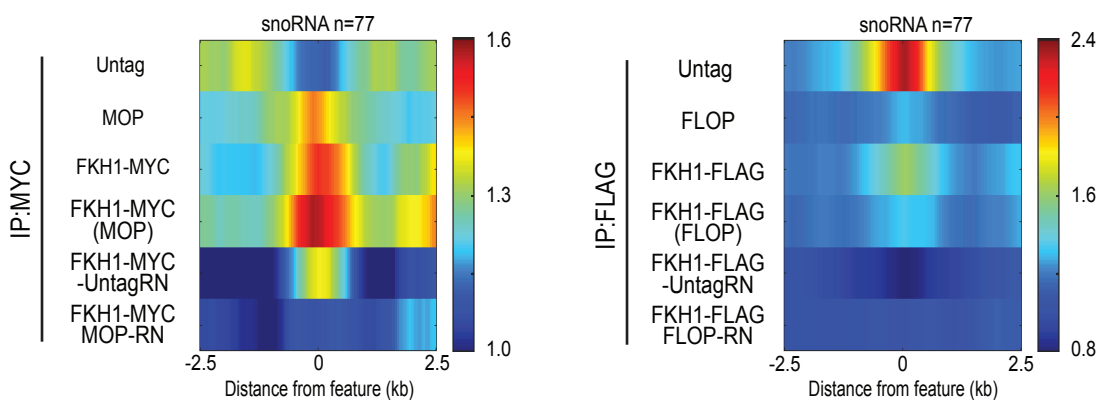

Figure S4

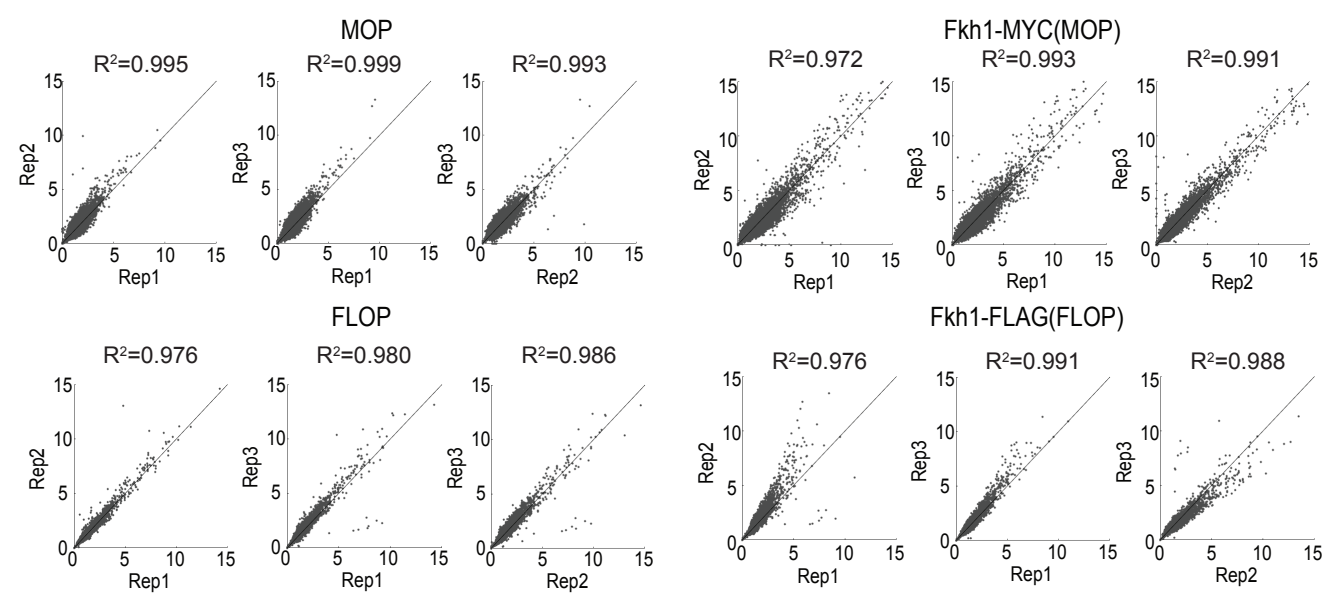

**Supplement to Figure S4.** Two-dimensional scatter plots analyzing correlation of replicates.

Figure S5

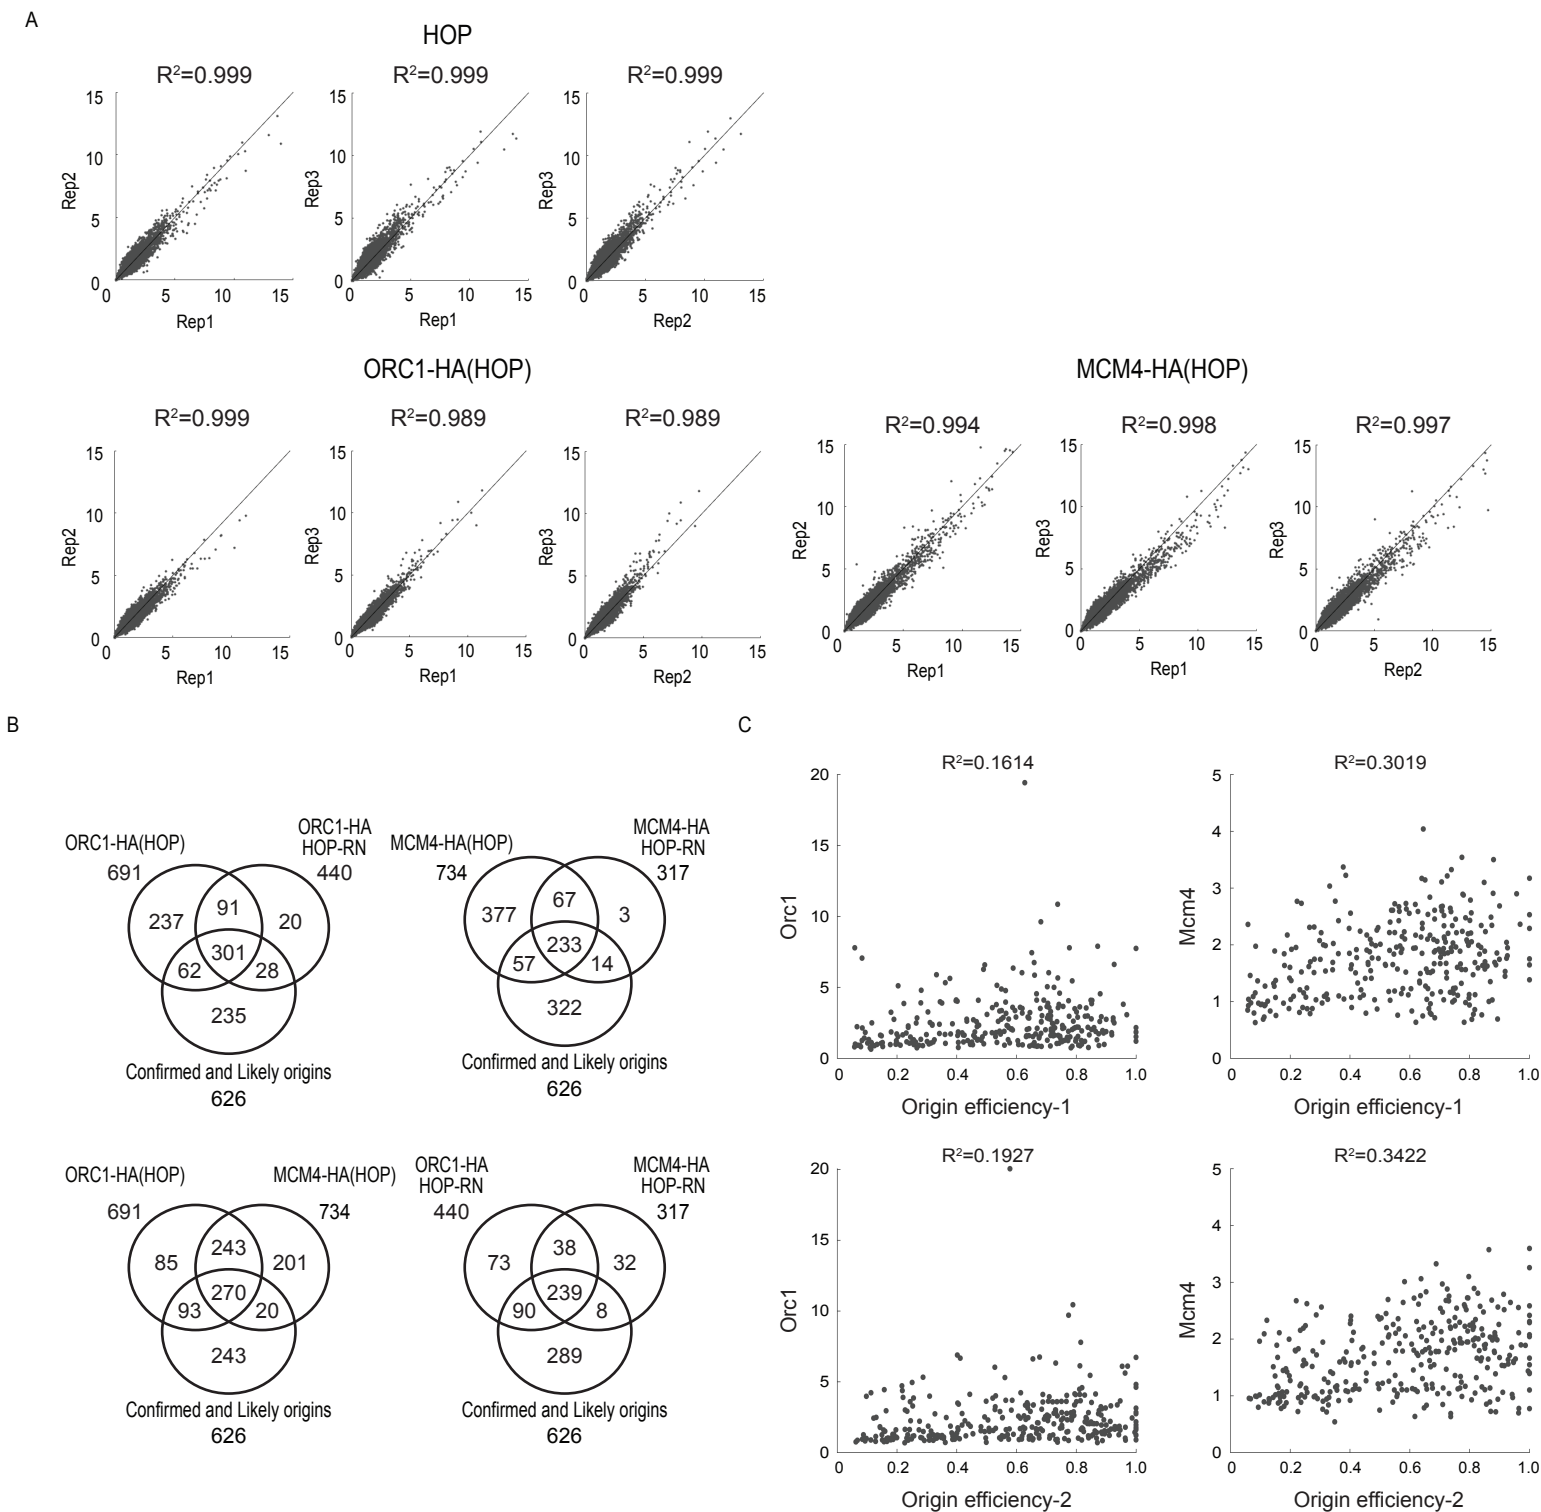

**Supplement to Figure S5. (A)** Two-dimensional scatter plots analyzing correlation of replicates. **(B)** Venn diagrams showing origin overlap of peaks called using RN and uncontrolled datasets against confirmed and likely origins. **(C)** Two-dimensional scatter plots comparing Orc1 and Mcm4 ChIP signals against origin efficiencies.

Figure S6

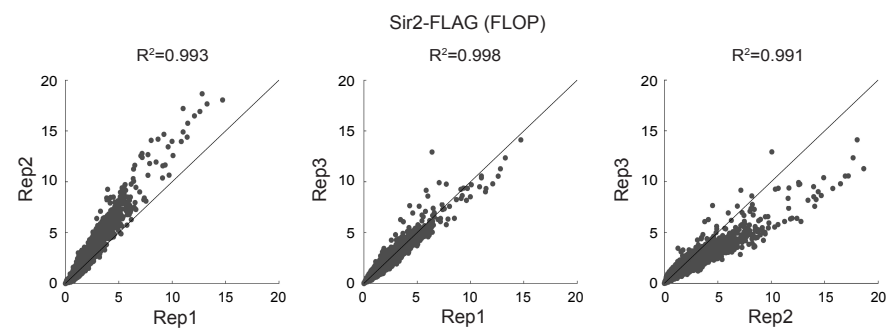

**Supplement to Figure S6.** Two-dimensional scatter plots analyzing correlation of replicates.

Figure S7  
A

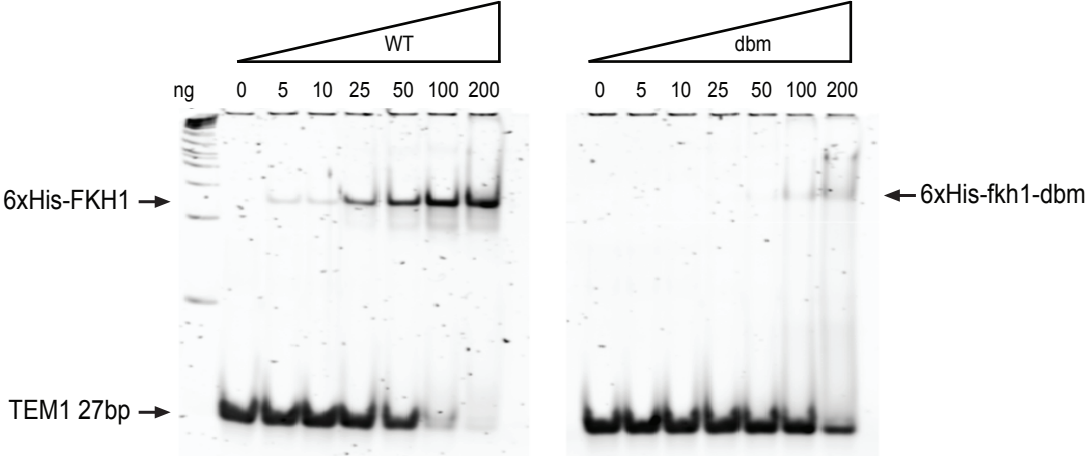

B

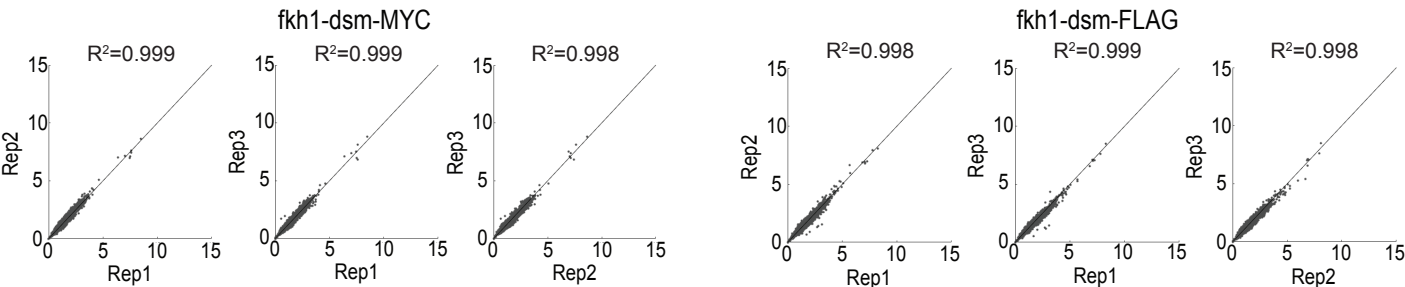

C

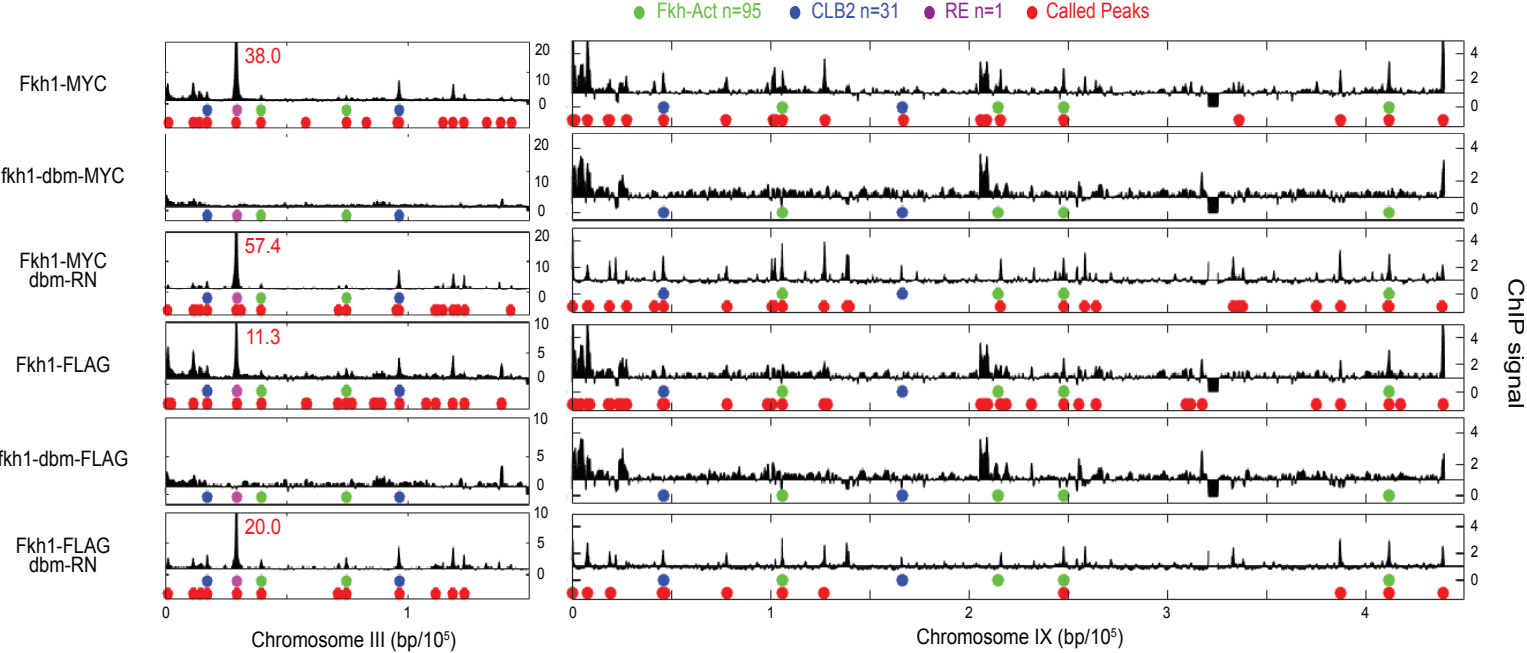

**Supplement to Figure S7. (A)** EMSA analysis of Fkh1-dbm versus Fkh1 binding to TEM1 DNA probe. **(B)** Two-dimensional scatter plots analyzing correlation of sample replicates. **(C)** Plots of ChIP signal across chromosomes III-L and IX with potential Fkh1 binding sites indicated as colored circles on one track and called peaks indicated on the lower track.
